# Supplementary material for: Determinants of Brachial-Ankle Pulse Wave Velocity and Carotid-Femoral Pulse Wave Velocity in Healthy Koreans
Source: PubMed Central journal article supplement — J Korean Med Sci. 2014 May 30;29(6):798–804. doi: 10.3346/jkms.2014.29.6.798 (PMC4055813; doi:10.3346/jkms.2014.29.6.798), 2014-05-30
Supplement: jkms-29-798-s001.pdf [file jkms-29-798-s001.pdf]

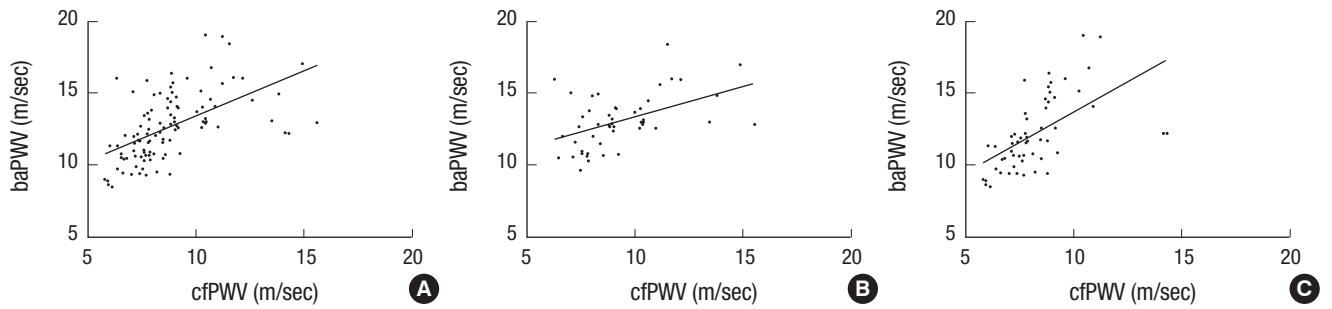

**Supplementary Fig. 1.** (A) Correlation between brachial-ankle pulse wave velocity (baPWV) and carotid-femoral pulse wave velocity (cfPWV) for all subjects ( $r = 0.55$ ,  $P < 0.001$ ). (B) Correlation between baPWV and cfPWV for males ( $r = 0.50$ ,  $P < 0.001$ ). (C) Correlation between baPWV and cfPWV for females ( $r = 0.58$ ,  $P < 0.001$ ).
